# Supplementary material
Source: PubMed Central journal article supplement (PMC5374007)
Supplement: NIHMS831959-supplement-1.pdf [file NIHMS831959-supplement-1.pdf]

# Supplementary Information

## Self-organized amniogenesis by human pluripotent stem cells in a biomimetic implantation-like niche

Yue Shao<sup>1,†</sup>, Kenichiro Taniguchi<sup>2,†</sup>, Katherine Gurdziel<sup>3</sup>, Ryan F. Townshend<sup>2</sup>, Xufeng Xue<sup>1</sup>, Koh Meng Aw Yong<sup>1</sup>, Jianming Sang<sup>1</sup>, Jason R. Spence<sup>2</sup>, Deborah L. Gumucio<sup>2,\*</sup>, Jianping Fu<sup>1,2,4,\*</sup>

<sup>1</sup>Department of Mechanical Engineering, University of Michigan, Ann Arbor, MI 48109, USA;

<sup>2</sup>Department of Cell and Developmental Biology, University of Michigan Medical School, Ann Arbor,

MI 48109, USA; <sup>3</sup>Institute of Environmental Health Sciences, Wayne State University, Detroit, MI

48202, USA; <sup>4</sup>Department of Biomedical Engineering, University of Michigan, Ann Arbor, MI, 48109,

USA.

<sup>†</sup>These authors contributed equally to this work;

\*Correspondence should be addressed to J. F. (jpfu@umich.edu) or D. L. G.

(dgumucio@med.umich.edu).

This document contains:

**Supplementary Figures and Captions**

**Supplementary Tables**

**Supplementary References**

## Supplementary Figures and Captions

### Supplementary Figure 1

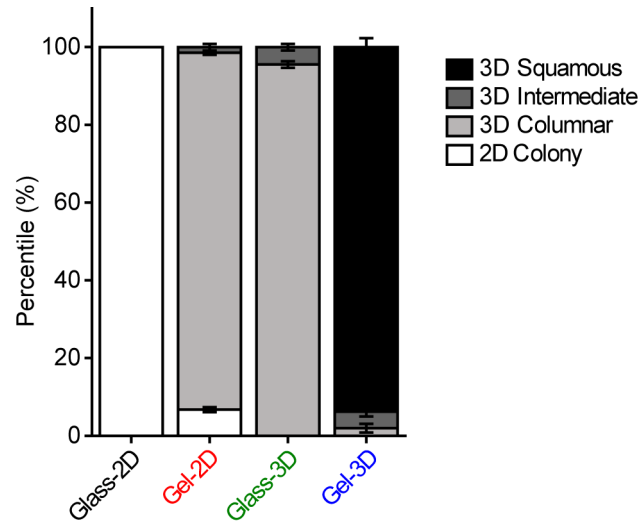

#### Supplementary Figure 1. Distinct morphogenesis of hPSCs under different culture conditions.

Stacked bar plots showing percentages of hPSC colonies or hPSC-derived epithelial cysts with different morphologies under different culture conditions as indicated. Semi-quantitative delineation of 3D columnar versus 3D squamous cysts was provided in **Fig. 1e**. A 3D intermediate cyst is defined as a cyst showing morphological transition from columnar to squamous (see also **Supplementary Fig. 3a**).  $n_{\text{cyst}}$  ( $n_{\text{colony}}$ ) = 100, 502, 469, and 694 for Glass-2D, Gel-2D, Glass-3D, and Gel-3D conditions, respectively. Data represent the mean  $\pm$  s.e.m with  $n = 3$  biological replicates from  $n = 2$  independent experiments. Same observation has been successfully repeated in total  $n = 16$  independent experiments.

## Supplementary Figure 2

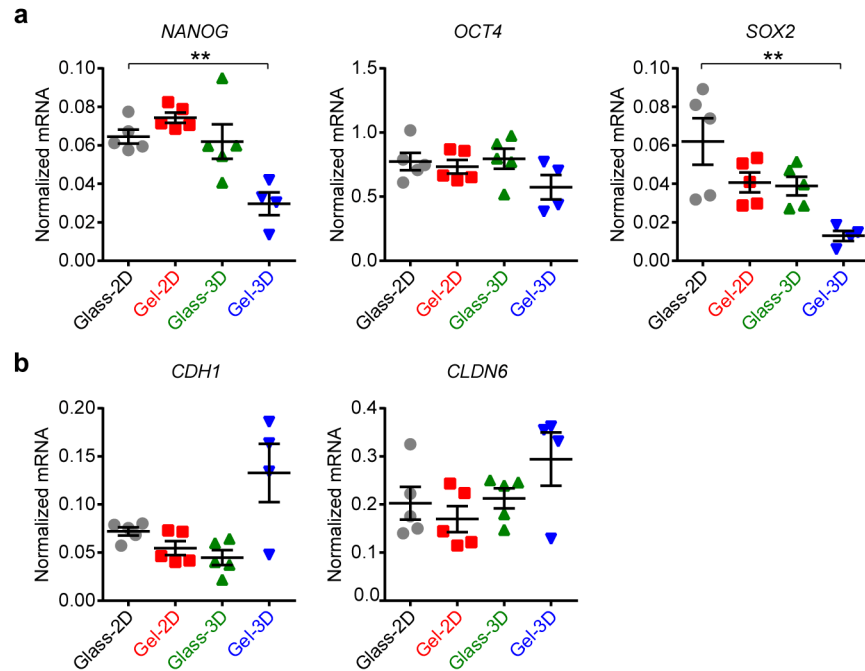

**Supplementary Figure 2. Squamous epithelial cysts derived from hPSCs show blunted transcriptional suppression of pluripotency genes while maintaining epithelial features.** qRT-PCR analysis of pluripotency genes *NANOG*, *OCT4*, and *SOX2* (a), as well as epithelial markers *CDH1* and *CLDN6* (b), for hPSCs cultured in indicated conditions. Data were normalized against *GAPDH* and plotted as the mean  $\pm$  s.e.m, with  $n = 4 - 5$  biological replicates indicated by individual dots under each condition.  $n = 2$  independent experiments.  $P$ -values were calculated using unpaired, two-sided Student's  $t$ -test. \*\*:  $P < 0.01$ .

**Supplementary Figure 3**

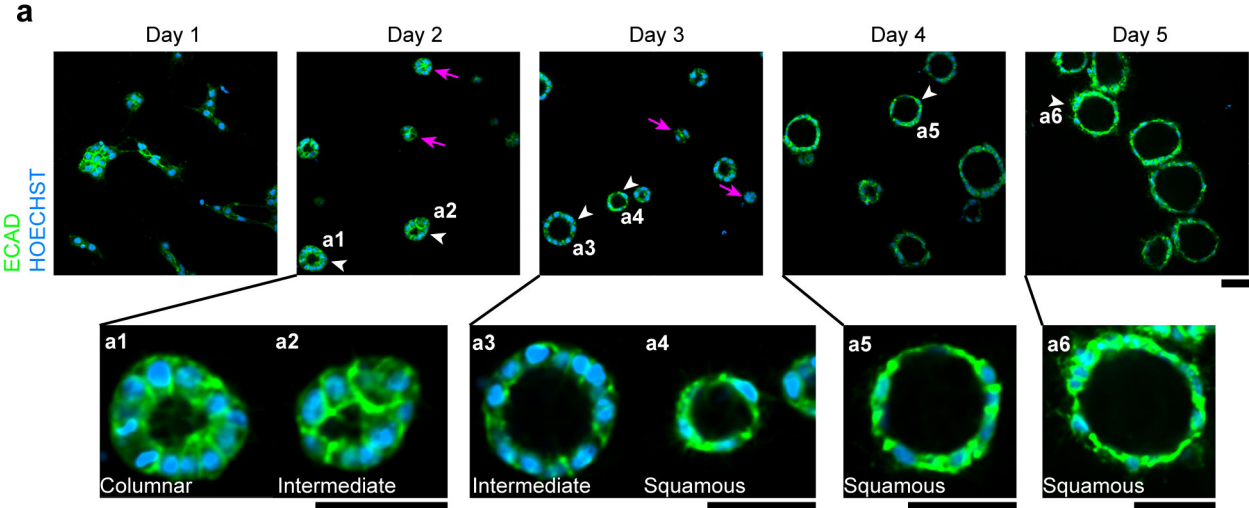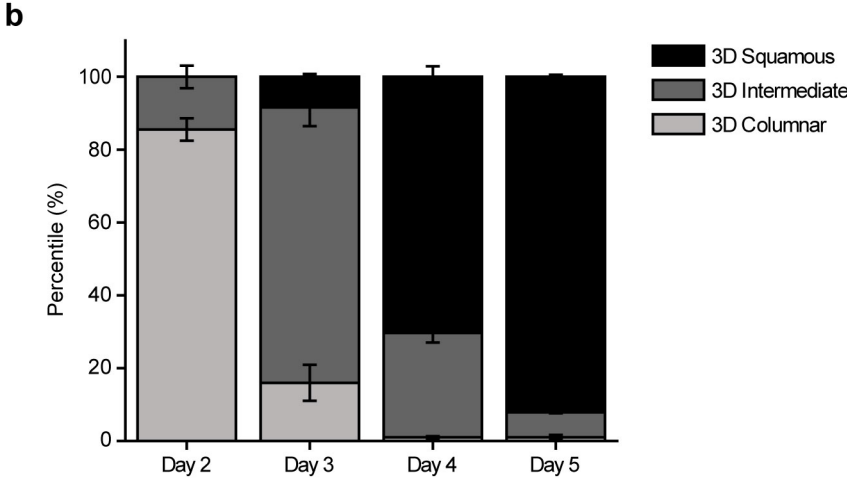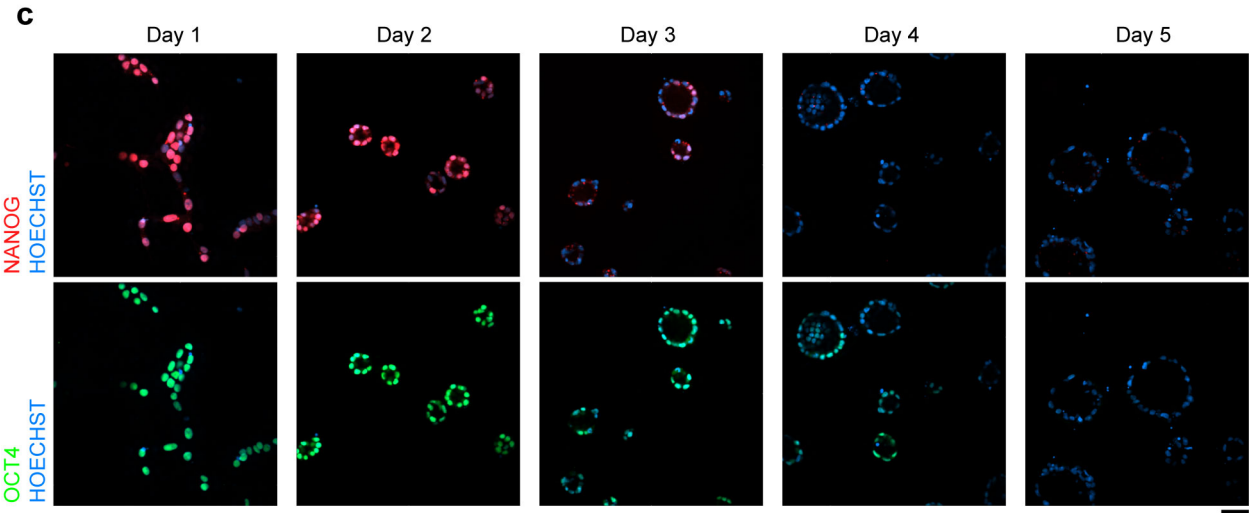

**Supplementary Figure 3. Morphogenic cytodifferentiation of hPSCs over time in the implantation-like Gel-3D niche.** (a) Confocal micrographs taken at different days (as indicated), showing immunostaining of ECAD (green) and counterstaining by HOECHST (blue) to examine morphological evolution of hPSCs cultured in the implantation-like Gel-3D niche. Magnified views of individual cysts (marked by white arrowheads) at different time points reveal a morphological transition from columnar to intermediate, to squamous cysts (**a1-a6**). Some hPSC clusters (marked by magenta arrows) did not form recognizable open lumens at day 2 or day 3. Such clusters were excluded from the quantification of time-dependent cyst morphological change in **b**. (b) Stacked bar plot showing percentages of hPSC-derived epithelial cysts with different morphologies in the implantation-like Gel-3D niche at days 2, 3, 4, and 5. Data represent the mean  $\pm$  s.e.m with  $n_{\text{cyst}} = 424$  (day 2), 534 (day 3), 652 (day 4), and 542 (day5).  $n = 3$  biological replicates for each condition. (c) Confocal micrographs showing co-staining of NANOG (red) and OCT4 (green) for hPSCs cultured in the implantation-like Gel-3D niche at different days as indicated. HOECHST (blue) counterstains the nucleus. Scale bars in **a&c**, 50  $\mu\text{m}$ .  $n = 2$  independent experiments.

# Supplementary Figure 4

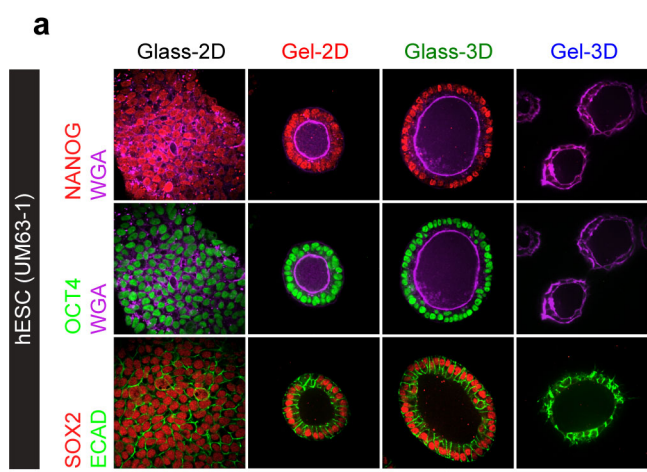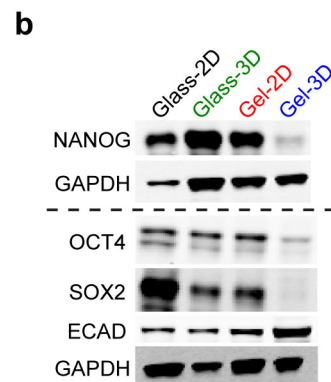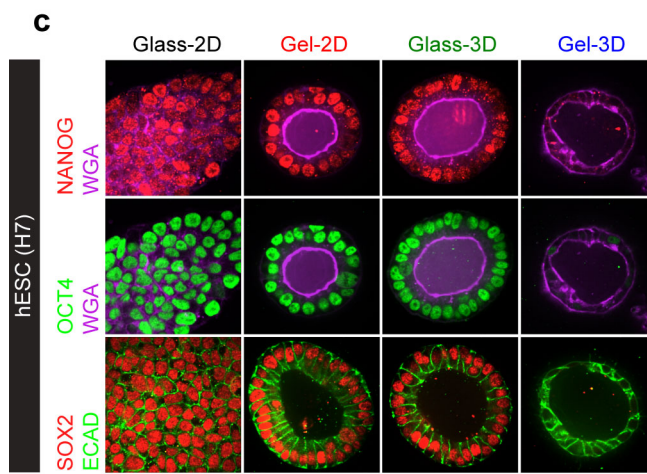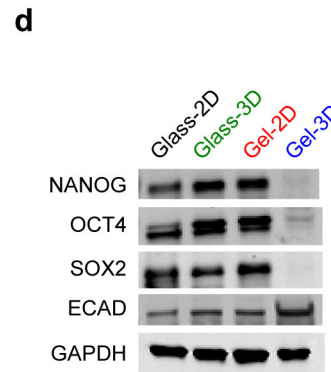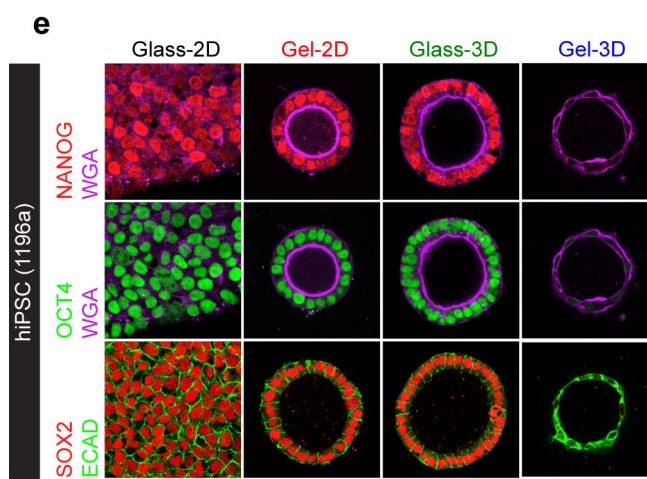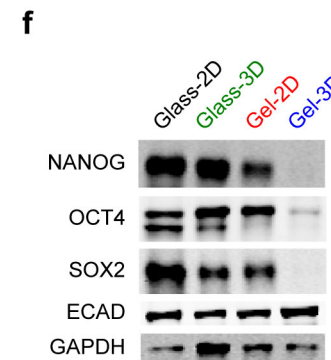

**Supplementary Figure 4. The implantation-like Gel-3D niche induces spontaneous, self-organized development of squamous epithelial cysts from multiple hPSC lines.** Confocal micrographs showing immunostaining of pluripotency markers NANOG (red; *top*), OCT4 (green; *middle*), and SOX2 (red; *bottom*), pan-cell membrane marker WGA (purple; *top and middle*), and basolateral membrane marker ECAD (green; *bottom*), in the UM63-1 hESC line (**a**), H7 hESC line (**c**), and 1196a hiPSC line (**e**) cultured under indicated conditions. Scale bars, 50  $\mu\text{m}$ . Western blot showing expression levels of NANOG, OCT4, SOX2, ECAD, and GAPDH in the UM63-1 hESC (**b**), H7 hESC (**d**), and 1196a hiPSC (**f**) cultured under indicated conditions. Immunofluorescence staining and Western blotting for each cell line was conducted for  $n = 2$  independent experiments.

## Supplementary Figure 5

**a**

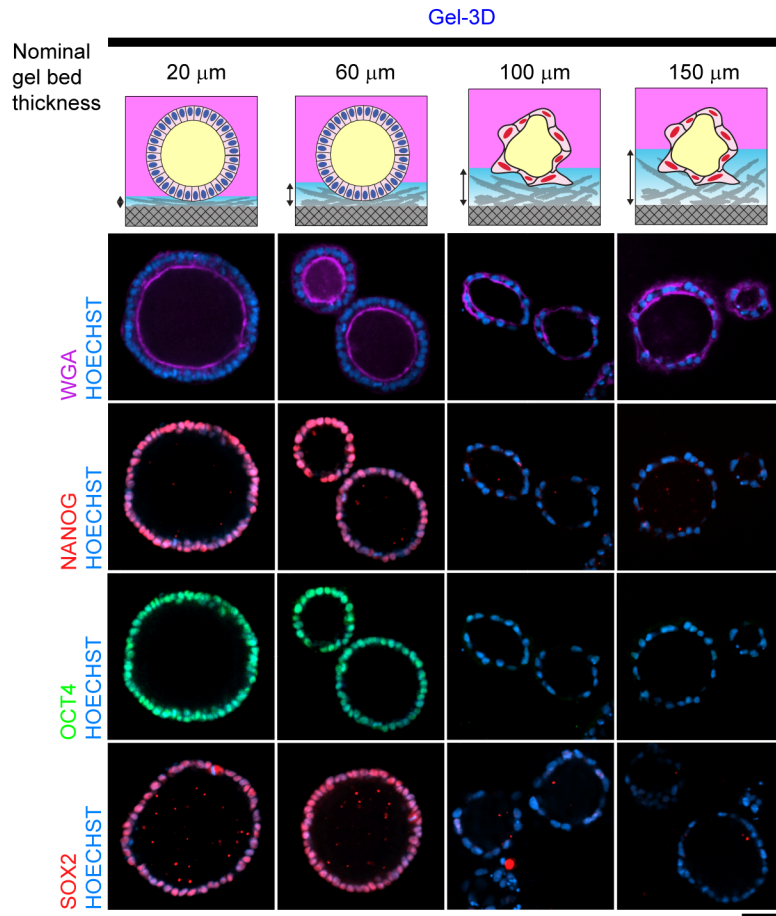

**b**

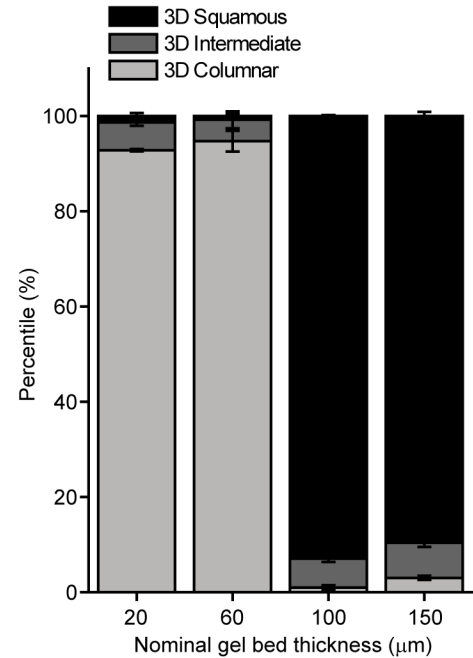

**Supplementary Figure 5. Self-organized development of squamous epithelial cystic tissues from hPSCs in the implantation-like Gel-3D niche requires a thick gel bed. (a)** Confocal micrographs showing immunostaining of WGA (purple), NANOG (red), OCT4 (green), and SOX2 (red) and counterstaining by HOECHST (blue) for hPSCs cultured in Gel-3D with varying nominal gel bed thicknesses as indicated. Cartoons show the typical epithelial cyst morphology observed under each condition.  $n = 2$  independent experiments. Scale bar, 50  $\mu\text{m}$ . **(b)** Stacked bar plot showing percentages of hPSC-derived epithelial cysts with different morphologies in Gel-3D as a function of the nominal gel bed thickness. Data represent the mean  $\pm$  s.e.m with  $n_{\text{cyst}} = 306, 361, 694,$  and 492 for gel beds of 20, 60,



100, and 150  $\mu\text{m}$  thickness, respectively.  $n = 3$  biological replicates for each condition.  $n = 2$  independent experiments.

## Supplementary Figure 6

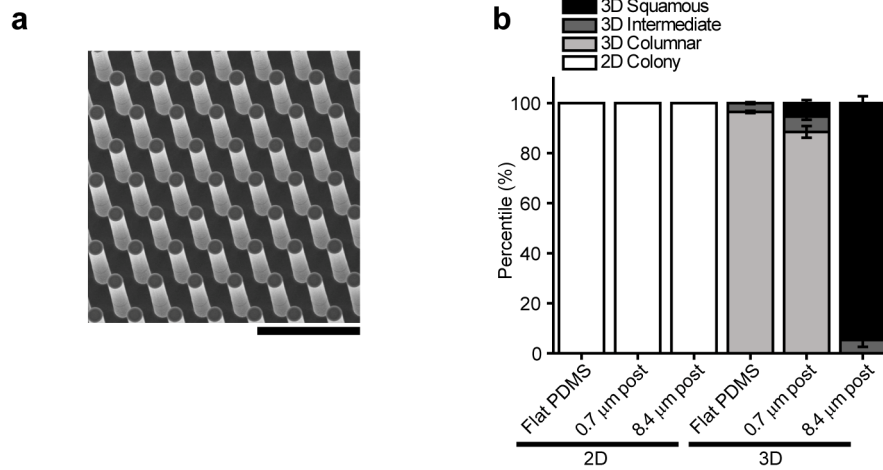

**Supplementary Figure 6. An artificial matrix containing an elastomeric micropost array supports self-organized development of hPSCs into epithelial cystic tissues with squamous, human amnion-like morphology. (a)** Scanning electron microscopy (SEM) image of the elastomeric polydimethylsiloxane (PDMS) micropost array with a post diameter of  $1.83 \mu\text{m}$ , a post height of  $8.4 \mu\text{m}$ , and a post center-to-center distance of  $4 \mu\text{m}$ . Scale bar,  $10 \mu\text{m}$ . **(b)** Stacked bar plot showing percentages of hPSC colony or hPSC-derived epithelial cysts with different morphologies as a function of PDMS micropost height and ECM dimensionality. Flat PDMS surfaces without microposts (thus with a micropost height of  $0 \mu\text{m}$ ) were included for comparison. Data represent the mean  $\pm$  s.e.m with  $n_{\text{colony}} = 100$  for all three 2D culture conditions and  $n_{\text{cyst}} = 250, 270,$  and  $282$  for 3D cultures using flat PDMS,  $0.7 \mu\text{m}$  tall micropost, and  $8.4 \mu\text{m}$  tall micropost, respectively.  $n = 3$  biological replicates for each condition.  $n = 3$  independent experiments.

## Supplementary Figure 7

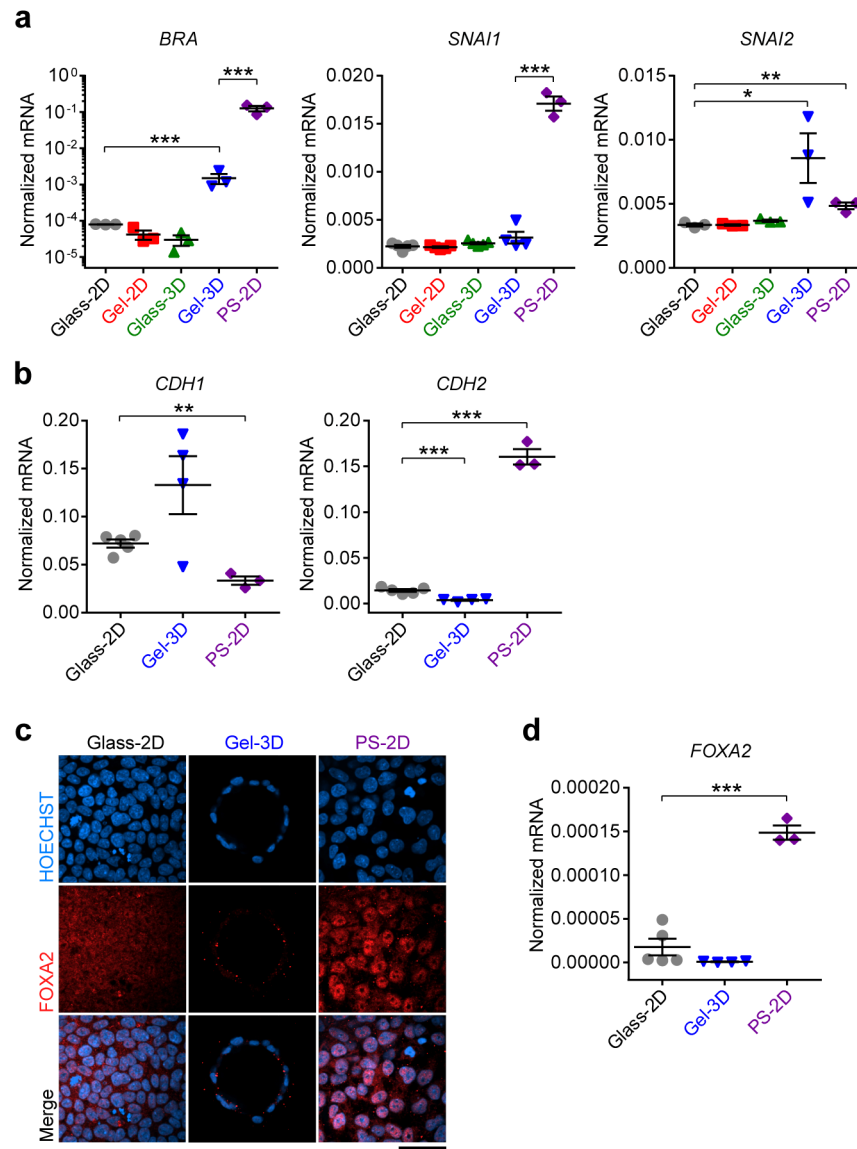

**Supplementary Figure 7. Development of squamous cystic tissues by hPSCs in the implantation-like Gel-3D niche activates a unique subset of epithelial-to-mesenchymal transition-related transcription factors. (a,b)** qRT-PCR analysis of *BRACHYURY* (*BRA*), *SNAIL*, *SNAI2* (a), *CDH1*, and *CDH2* (b), for hPSCs cultured in indicated conditions. Data were normalized against *GAPDH* and plotted as the mean  $\pm$  s.e.m, with  $n = 3 - 5$  biological replicates indicated by individual dots under each condition,  $n = 2$  independent experiments. Data in b for *CDH1* under both Glass-2D and Gel-3D conditions are the same as those in **Supplementary Fig. 2b**. (c) Confocal

micrographs showing immunostaining of FOXA2 (red) and counterstaining by HOECHST (blue) for hPSCs cultured in Glass-2D, Gel-3D, and PS-2D conditions as indicated. Scale bar, 50  $\mu\text{m}$ .  $n = 2$  independent experiments. **(d)** qRT-PCR analysis of *FOXA2* for hPSCs cultured in different conditions as indicated. Data were normalized against *GAPDH* and plotted as the mean  $\pm$  s.e.m, with  $n = 3 - 5$  biological replicates indicated by individual dots under each condition. *P*-values were calculated using unpaired, two-sided Student's *t*-test. \*:  $P < 0.05$ ; \*\*:  $P < 0.01$ ; \*\*\*:  $P < 0.001$ .  $n = 2$  independent experiments.

## Supplementary Figure 8

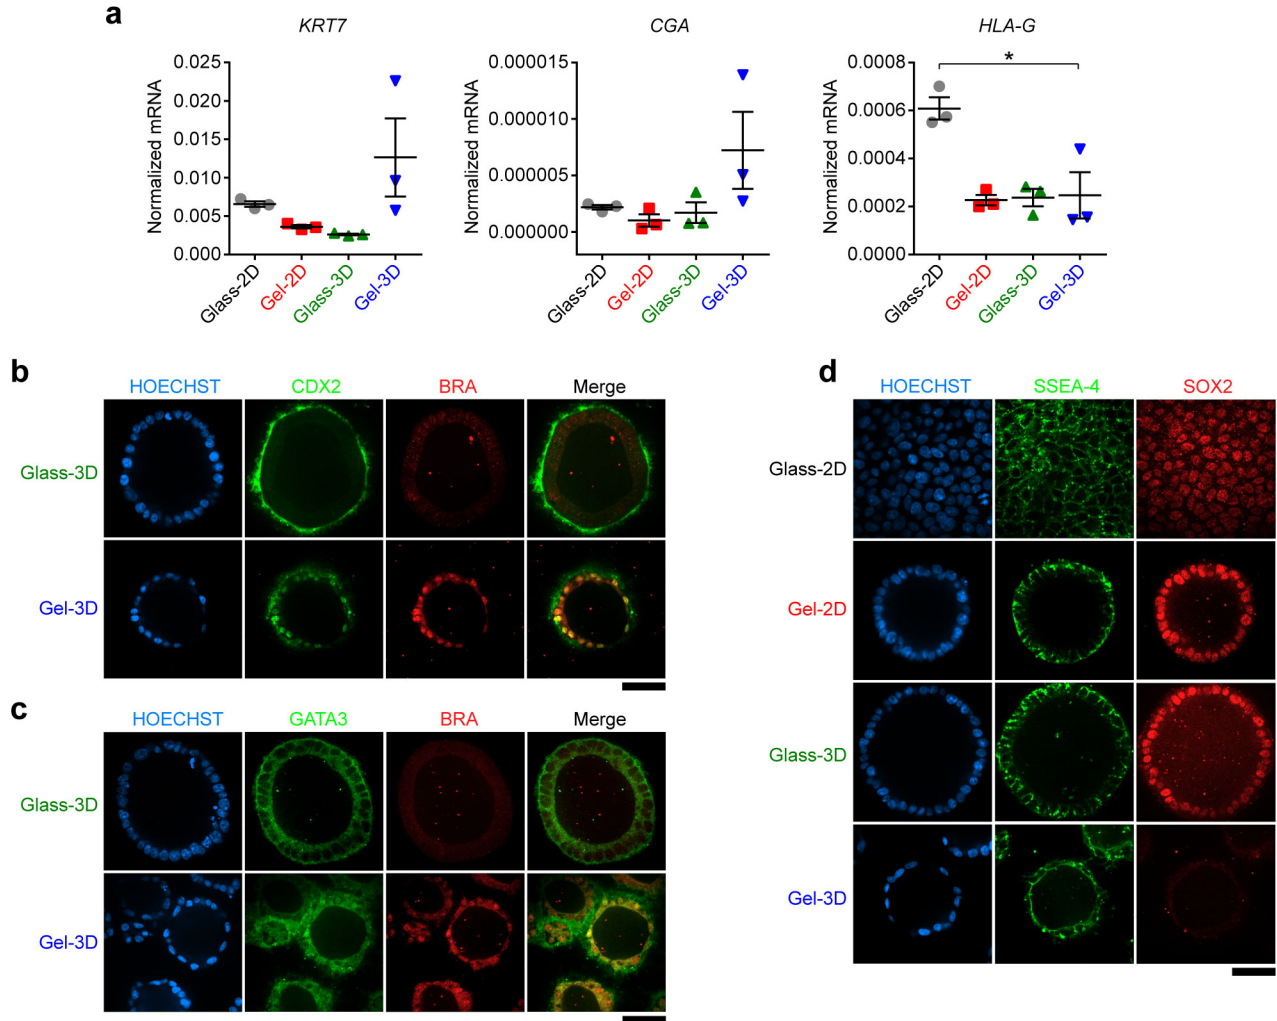

### Supplementary Figure 8. hPSC-derived squamous cystic tissue lacks molecular features

**associated with trophoblasts.** (a) qRT-PCR analysis of trophoblast markers *KRT7*, *CGA*, and *HLA-G*, for hPSCs under different culture conditions as indicated. Data were normalized against *GAPDH* before being plotted as the mean  $\pm$  s.e.m, with  $n = 3$  biological replicates indicated by individual dots for each condition.  $n = 2$  independent experiments.  $P$ -values were calculated using unpaired, two-sided Student's  $t$ -test. \*:  $P < 0.05$ . (b&c) Confocal micrographs showing co-staining of BRA (red) with CDX2 (green; b) or GATA3 (green; c), for hPSCs under both Glass-3D and Gel-3D culture conditions. HOECHST (blue) counterstains the nucleus.  $n = 2$  independent experiments. (d) Confocal micrographs showing co-

staining of SSEA-4 (green) with SOX2 (red) for hPSCs cultured in different conditions as indicated.

HOECHST (blue) counterstains the nucleus.  $n = 2$  independent experiments. Scale bars in **b-d**, 50  $\mu\text{m}$ .

## Supplementary Figure 9

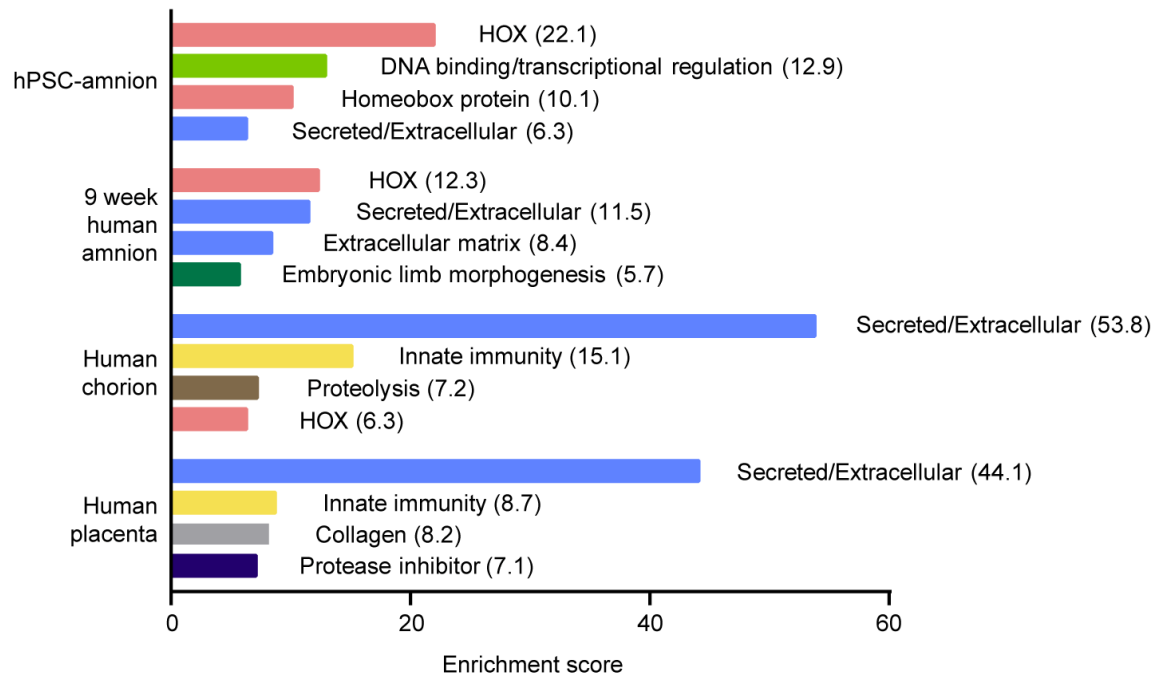

**Supplementary Figure 9. Gene ontology (GO) functional annotation clustering.** Genes enriched in hPSC-amnion, 9-week human amnion, human chorion, and human placenta, respectively, relative to hPSCs, were subjected to functional annotation clustering analysis using DAVID. For each data set, the four annotation clusters with the highest enrichment scores (plotted along the *x*-axis and also listed in parentheses following the annotation term) are presented. The data sets used for 9-week human amnion, human chorion, and human placenta are from a previous publication (GEO accession number GSE66302)<sup>1</sup>.

### Supplementary Figure 10

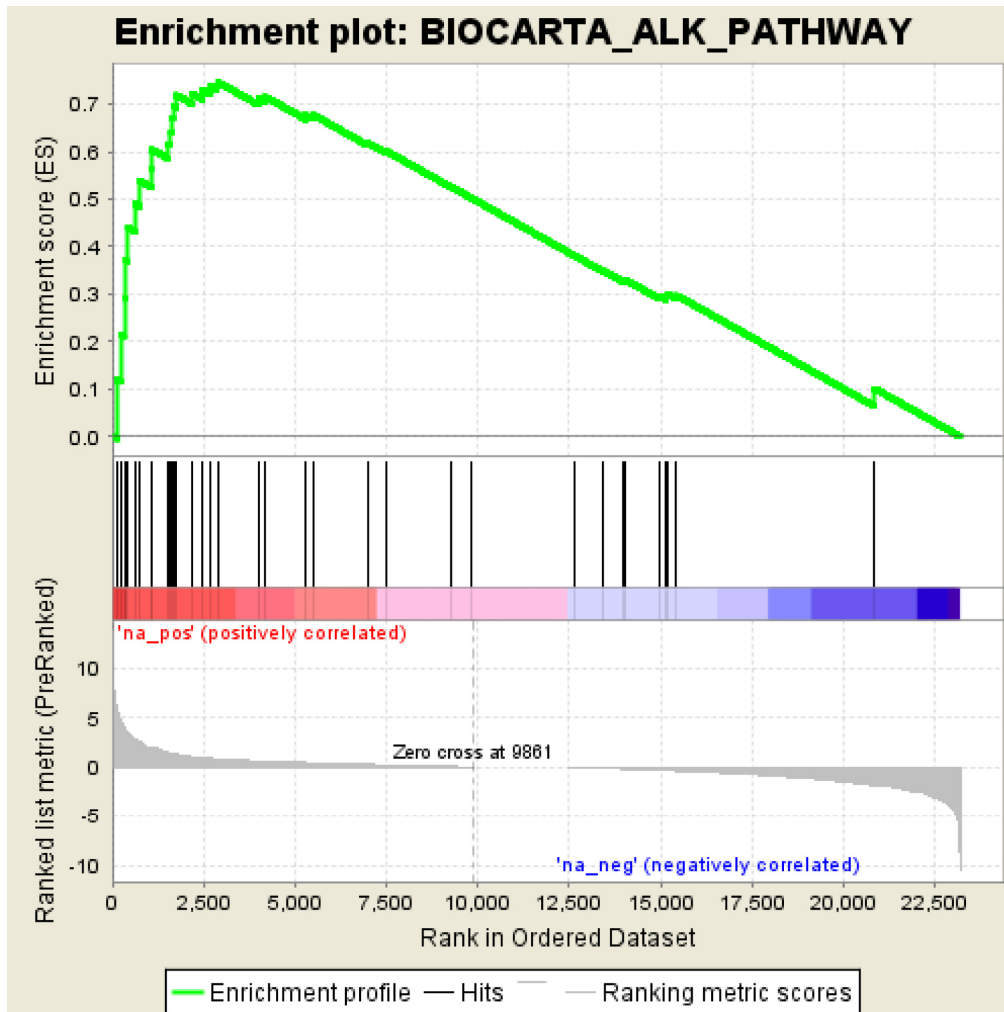

**Supplementary Figure 10. Gene set enrichment analysis (GSEA) for 35 ALK-pathway genes in hPSC-amnion.** The entire ranked list of genes, ordered by fold change of expression level in hPSC-amnion relative to hPSCs (as shown in **Supplementary Table 1**), was queried using the gene set, BIOCARTA\_ALK\_PATHWAY, which contains 35 genes associated with BMP signaling. Significant enrichment of ALK-pathway related genes was observed in hPSC-amnion. (see **Supplementary Table 5** for tabulated enrichment analysis results).



## Supplementary Figure 11

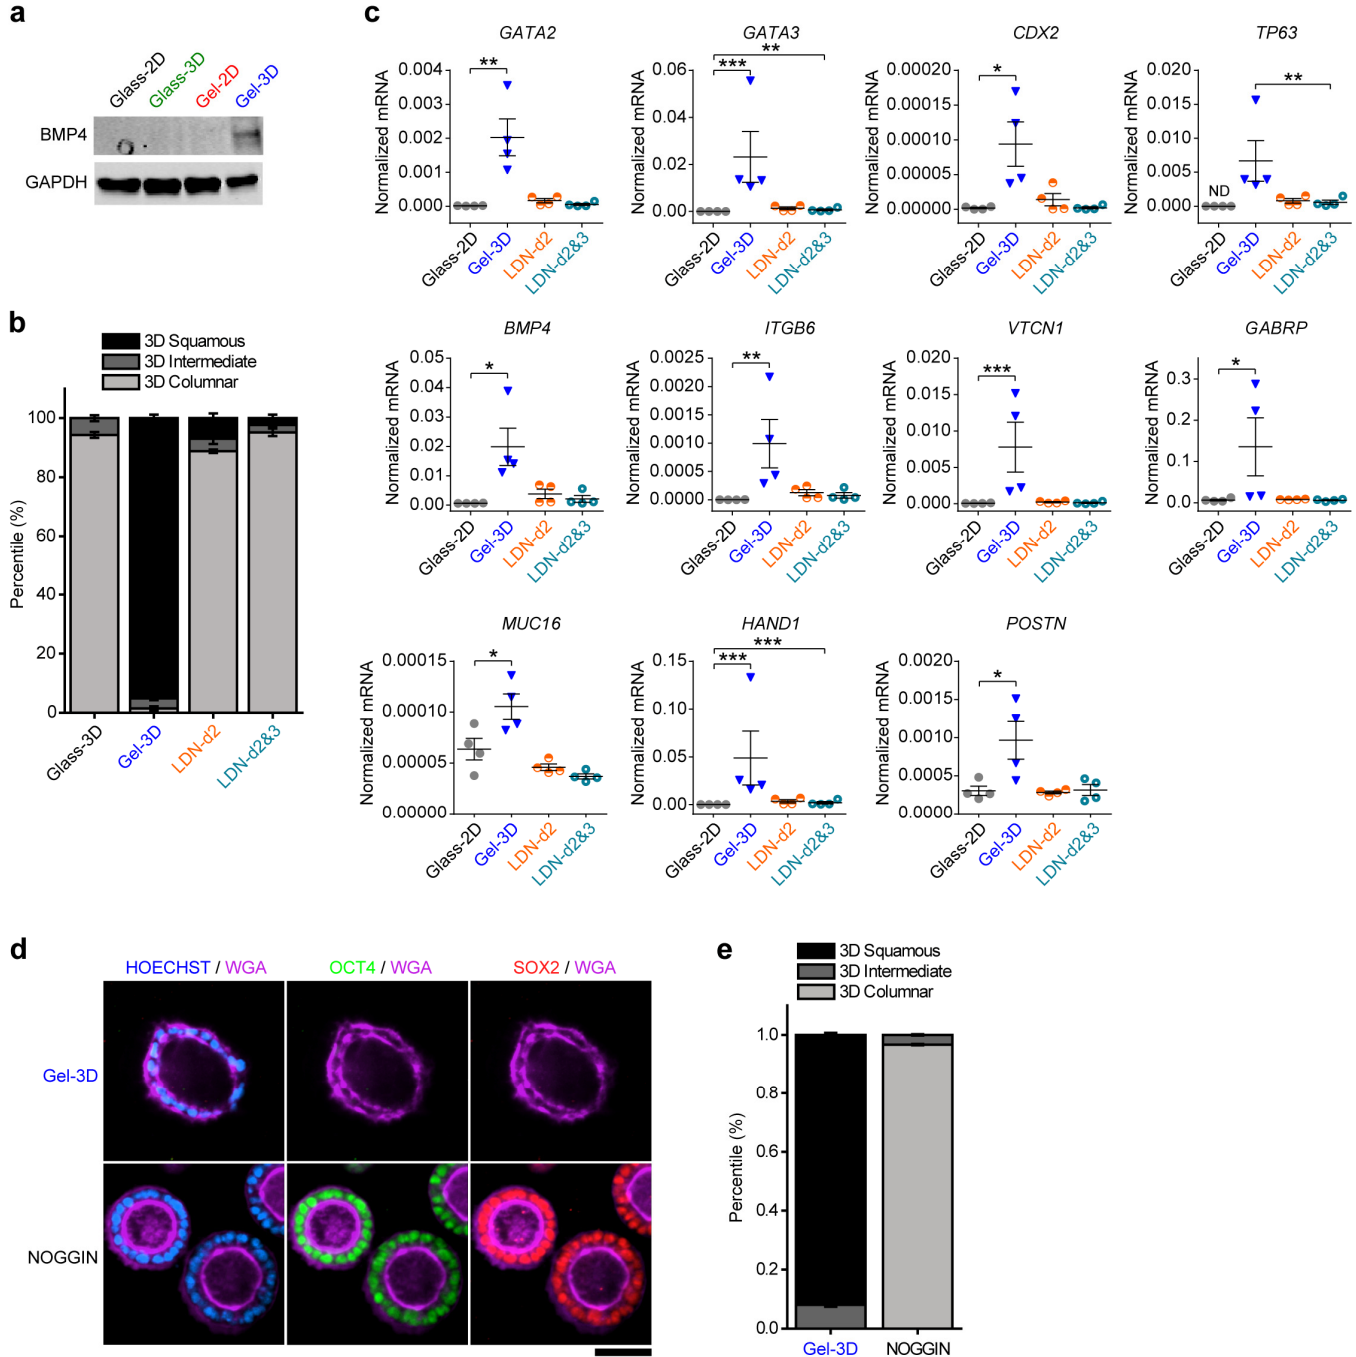

**Supplementary Figure 11. BMP signaling is required for the development of amnion-like squamous tissue from hPSCs.** (a) Western blot showing expression levels of BMP4 and GAPDH in cells cultured under different conditions as indicated. (b) Stacked bar plot showing percentages of hPSC-derived epithelial cysts with different morphologies in Glass-3D supplemented with DMSO

(Glass-3D; negative control), in Gel-3D supplemented with DMSO (Gel-3D; positive control), and in Gel-3D supplemented with LDN193189 (LDN; 500 nM) on day 2 only (LDN-d2) or on both days 2 and 3 (LDN-d2&3).  $n_{\text{cyst}} = 144, 311, 365, \text{ and } 320$  for Glass-3D, Gel-3D, LDN-d2, and LDN-d2&3, respectively.  $n = 3$  biological replicates for each condition.  $n = 2$  independent experiments. **(c)** qRT-PCR analysis of *GATA2*, *GATA3*, *CDX2*, *TP63*, *BMP4*, *ITGB6*, *VTCN1*, *GABRP*, *MUC16*, *HAND1*, and *POSTN* under Glass-3D, Gel-3D, LDN-d2, and LDN-d2&3 conditions. Data were normalized against *GAPDH* and plotted as the mean  $\pm$  s.e.m, with  $n = 4$  biological replicates indicated by individual dots for each condition.  $n = 2$  independent experiments. *ND*, not detected, with its normalized value set to zero. *P*-values were calculated using unpaired, two-sided Student's *t*-test. *P*-value calculation was not performed against "*ND*" result. \*:  $P < 0.05$ ; \*\*:  $P < 0.01$ ; \*\*\*:  $P < 0.001$ . **(d)** Immunofluorescence analysis of cysts cultured under Gel-3D condition without (top panel) or with (bottom panel) NOGGIN treatment. Cysts were stained for OCT4 (green), SOX2 (red), and WGA (purple). HOECHST (blue) counterstains the nucleus. Scale bar, 50  $\mu\text{m}$ . **(e)** Stacked bar plots show percentages of hPSC-derived epithelial cysts with different morphologies in the Gel-3D system without ("Gel-3D" group) or with ("NOGGIN" group) NOGGIN treatment.  $n_{\text{cyst}} = 131$  and 241 for Gel-3D and NOGGIN groups, respectively. Data represent the mean  $\pm$  s.e.m. with  $n = 3$  biological replicates from  $n = 2$  independent experiments.

## **Supplementary Tables**

**Supplementary Table 1. Processed RNA-seq reads for control hPSCs (Glass-2D) and hPSC-  
amnion (Gel-3D).**

**(see separate Supplementary File)**

**Supplementary Table 2. List of 108 putative pluripotency genes<sup>2</sup> detected in hPSCs and hPSC-  
 amnion in RNA-seq. Genes are consecutively listed as plotted, from left to right, in Fig. 4f.**

|           |                 |           |                     |           |                 |            |                 |
|-----------|-----------------|-----------|---------------------|-----------|-----------------|------------|-----------------|
| <b>1</b>  | <i>CUZD1</i>    | <b>28</b> | <i>SCLY</i>         | <b>55</b> | <i>TOMM40</i>   | <b>82</b>  | <i>RLIM</i>     |
| <b>2</b>  | <i>CER1</i>     | <b>29</b> | <i>TXLNG</i>        | <b>56</b> | <i>SEPHS1</i>   | <b>83</b>  | <i>RC3H2</i>    |
| <b>3</b>  | <i>CCL26</i>    | <b>30</b> | <i>JMJD1C</i>       | <b>57</b> | <i>SLIRP</i>    | <b>84</b>  | <i>PINX1</i>    |
| <b>4</b>  | <i>LEFTY2</i>   | <b>31</b> | <i>EIF2AK4</i>      | <b>58</b> | <i>EMG1</i>     | <b>85</b>  | <i>RPRM</i>     |
| <b>5</b>  | <i>GDF3</i>     | <b>32</b> | <i>TARS</i>         | <b>59</b> | <i>DDX18</i>    | <b>86</b>  | <i>GRPR</i>     |
| <b>6</b>  | <i>ADD2</i>     | <b>33</b> | <i>SNURF</i>        | <b>60</b> | <i>MTAP</i>     | <b>87</b>  | <i>GNPTAB</i>   |
| <b>7</b>  | <i>DDX21</i>    | <b>34</b> | <i>RRP15</i>        | <b>61</b> | <i>TFAM</i>     | <b>88</b>  | <i>FGF2</i>     |
| <b>8</b>  | <i>PNO1</i>     | <b>35</b> | <i>USP45</i>        | <b>62</b> | <i>NIP7</i>     | <b>89</b>  | <i>MYO1E</i>    |
| <b>9</b>  | <i>DPPA4</i>    | <b>36</b> | <i>SHISA9</i>       | <b>63</b> | <i>HSPD1</i>    | <b>90</b>  | <i>LARP7</i>    |
| <b>10</b> | <i>RRAS2</i>    | <b>37</b> | <i>NANOG</i>        | <b>64</b> | <i>TIMM8A</i>   | <b>91</b>  | <i>CACHD1</i>   |
| <b>11</b> | <i>GABRB3</i>   | <b>38</b> | <i>CCRN4L</i>       | <b>65</b> | <i>POU5F1</i>   | <b>92</b>  | <i>PHC1</i>     |
| <b>12</b> | <i>RPL22L1</i>  | <b>39</b> | <i>C10orf76</i>     | <b>66</b> | <i>POU5F1P3</i> | <b>93</b>  | <i>VRTN</i>     |
| <b>13</b> | <i>MDN1</i>     | <b>40</b> | <i>EXOC2</i>        | <b>67</b> | <i>DDX6</i>     | <b>94</b>  | <i>TERF1</i>    |
| <b>14</b> | <i>GAL</i>      | <b>41</b> | <i>G3BP2</i>        | <b>68</b> | <i>CENPN</i>    | <b>95</b>  | <i>CHAC2</i>    |
| <b>15</b> | <i>PMAIP1</i>   | <b>42</b> | <i>PHAX</i>         | <b>69</b> | <i>TUBB2B</i>   | <b>96</b>  | <i>TDGF1</i>    |
| <b>16</b> | <i>BICD1</i>    | <b>43</b> | <i>CDC25A</i>       | <b>70</b> | <i>DENR</i>     | <b>97</b>  | <i>SLC25A21</i> |
| <b>17</b> | <i>AKIRIN1</i>  | <b>44</b> | <i>MTHFD1L</i>      | <b>71</b> | <i>CASP3</i>    | <b>98</b>  | <i>USP44</i>    |
| <b>18</b> | <i>FGD6</i>     | <b>45</b> | <i>RNASEH1</i>      | <b>72</b> | <i>SKP2</i>     | <b>99</b>  | <i>LEFTY1</i>   |
| <b>19</b> | <i>MRS2</i>     | <b>46</b> | <i>LITD1</i>        | <b>73</b> | <i>MKKS</i>     | <b>100</b> | <i>NODAL</i>    |
| <b>20</b> | <i>BPTF</i>     | <b>47</b> | <i>LRR1</i>         | <b>74</b> | <i>NUDT15</i>   | <b>101</b> | <i>RRM2</i>     |
| <b>21</b> | <i>KIF13A</i>   | <b>48</b> | <i>MRPS30</i>       | <b>75</b> | <i>FKBP4</i>    | <b>102</b> | <i>GLB1L3</i>   |
| <b>22</b> | <i>RAC3</i>     | <b>49</b> | <i>PSME3</i>        | <b>76</b> | <i>NUP160</i>   | <b>103</b> | <i>C21orf88</i> |
| <b>23</b> | <i>C9orf85</i>  | <b>50</b> | <i>MSH2</i>         | <b>77</b> | <i>TMPO</i>     | <b>104</b> | <i>SMPDL3B</i>  |
| <b>24</b> | <i>DNAH14</i>   | <b>51</b> | <i>EEF1E1</i>       | <b>78</b> | <i>MMS22L</i>   | <b>105</b> | <i>UNC5D</i>    |
| <b>25</b> | <i>METTL21A</i> | <b>52</b> | <i>NLN</i>          | <b>79</b> | <i>ESRP1</i>    | <b>106</b> | <i>LECT1</i>    |
| <b>26</b> | <i>METTL8</i>   | <b>53</b> | <i>LOC100506054</i> | <b>80</b> | <i>SKIL</i>     | <b>107</b> | <i>ZIC3</i>     |
| <b>27</b> | <i>BCAT1</i>    | <b>54</b> | <i>NOLC1</i>        | <b>81</b> | <i>SNX5</i>     | <b>108</b> | <i>RTP1</i>     |

**Supplementary Table 3. List of 50 most up-regulated genes (UP-50) and 50 most down-regulated genes (DOWN-50) in hPSC-amnion compared with hPSCs. Genes are consecutively listed as plotted, from left to right, in Fig. 4f.**

| UP-50 genes |                  |      |                  | DOWN-50 genes |                     |      |                     |
|-------------|------------------|------|------------------|---------------|---------------------|------|---------------------|
| Rank        | Gene             | Rank | Gene             | Rank          | Gene                | Rank | Gene                |
| 1           | <i>HAND1</i>     | 26   | <i>PLSCR5</i>    | 1             | <i>CUZD1</i>        | 26   | <i>VTN</i>          |
| 2           | <i>TFAP2B</i>    | 27   | <i>HOXC13</i>    | 2             | <i>CH25H</i>        | 27   | <i>IFITM5</i>       |
| 3           | <i>ISL1</i>      | 28   | <i>MEIS1</i>     | 3             | <i>PTGFR</i>        | 28   | <i>MIRLET7BHG</i>   |
| 4           | <i>LUM</i>       | 29   | <i>WNT6</i>      | 4             | <i>TMPRSS3</i>      | 29   | <i>LOC399829</i>    |
| 5           | <i>C8orf4</i>    | 30   | <i>NR2F2</i>     | 5             | <i>JAKMIP2-AS1</i>  | 30   | <i>XIST</i>         |
| 6           | <i>EVX1</i>      | 31   | <i>MSX2</i>      | 6             | <i>ANKRD22</i>      | 31   | <i>KCNJ1</i>        |
| 7           | <i>DLX5</i>      | 32   | <i>CCR1</i>      | 7             | <i>ISL2</i>         | 32   | <i>UCP1</i>         |
| 8           | <i>TBX3</i>      | 33   | <i>CYSLTR2</i>   | 8             | <i>RXFP1</i>        | 33   | <i>TNFAIP6</i>      |
| 9           | <i>HOXB2</i>     | 34   | <i>EPAS1</i>     | 9             | <i>PCDHB1</i>       | 34   | <i>C3orf72</i>      |
| 10          | <i>ERP27</i>     | 35   | <i>KRT23</i>     | 10            | <i>OLIG3</i>        | 35   | <i>SEZ6</i>         |
| 11          | <i>COL3A1</i>    | 36   | <i>TP63</i>      | 11            | <i>WDR49</i>        | 36   | <i>CBLN4</i>        |
| 12          | <i>GATA3</i>     | 37   | <i>MEIS1-AS3</i> | 12            | <i>AQP7</i>         | 37   | <i>LOC100127888</i> |
| 13          | <i>GUCY1A3</i>   | 38   | <i>BARX2</i>     | 13            | <i>NLRP10</i>       | 38   | <i>FREM3</i>        |
| 14          | <i>P2RY6</i>     | 39   | <i>HMX1</i>      | 14            | <i>NPTX1</i>        | 39   | <i>TMEM114</i>      |
| 15          | <i>TNFSF8</i>    | 40   | <i>HOXC6</i>     | 15            | <i>LOC100507387</i> | 40   | <i>DRD1</i>         |
| 16          | <i>TFAP2A</i>    | 41   | <i>HOXB-AS1</i>  | 16            | <i>TAC1</i>         | 41   | <i>DSG3</i>         |
| 17          | <i>DCN</i>       | 42   | <i>IGFBP7</i>    | 17            | <i>GABRA1</i>       | 42   | <i>PRSS56</i>       |
| 18          | <i>VGLL1</i>     | 43   | <i>DIO3</i>      | 18            | <i>FOXE1</i>        | 43   | <i>CCR9</i>         |
| 19          | <i>HOXB9</i>     | 44   | <i>HOXB3</i>     | 19            | <i>NXF4</i>         | 44   | <i>GPR17</i>        |
| 20          | <i>GATA3-AS1</i> | 45   | <i>LOC642366</i> | 20            | <i>TPH2</i>         | 45   | <i>PAPLN</i>        |
| 21          | <i>CDX2</i>      | 46   | <i>ITGA8</i>     | 21            | <i>RUFY4</i>        | 46   | <i>COL20A1</i>      |
| 22          | <i>PGLYRP4</i>   | 47   | <i>C1orf105</i>  | 22            | <i>HTR1A</i>        | 47   | <i>HMX2</i>         |
| 23          | <i>SLC40A1</i>   | 48   | <i>ANKRD1</i>    | 23            | <i>SERPINB4</i>     | 48   | <i>LOC100507244</i> |
| 24          | <i>CHI3L2</i>    | 49   | <i>LCPI</i>      | 24            | <i>NEUROG3</i>      | 49   | <i>TPSB2</i>        |
| 25          | <i>HAND2</i>     | 50   | <i>DLX6</i>      | 25            | <i>CDH19</i>        | 50   | <i>MPO</i>          |

**Supplementary Table 4. List of hierarchically clustered ~4,000 pre-selected genes that have greater expression in hPSC-amnion than in hPSCs and in fetal extraembryonic tissues<sup>1</sup>. Genes are consecutively listed as plotted, from top to bottom, in Fig. 4g.**

**(See separate Supplementary File)**

**Supplementary Table 5. Tabulated gene set enrichment analysis (GSEA) results. The entire data set (hPSC-amnion versus hPSCs), as ranked and shown in Supplementary Table 1, was queried using the gene set, BIOCARTA\_ALK\_PATHWAY, a collection of 35 genes related to BMP signaling.**

| <b>Data set</b>                          |        | <b>Supplementary Table 1</b> |                   |                   |            |                 |
|------------------------------------------|--------|------------------------------|-------------------|-------------------|------------|-----------------|
| <b>Gene set</b>                          |        | <b>BIOCARTA_ALK_PATHWAY</b>  |                   |                   |            |                 |
| <b>Enrichment score (ES)</b>             |        | 0.7473358                    |                   |                   |            |                 |
| <b>Normalized enrichment score (NES)</b> |        | 2.1402795                    |                   |                   |            |                 |
| <b>Nominal p-value</b>                   |        | 0                            |                   |                   |            |                 |
| <b>FDR q-value</b>                       |        | 0                            |                   |                   |            |                 |
| <b>FWER p-value</b>                      |        | 0                            |                   |                   |            |                 |
|                                          | PROBE  | GENE SYMBOL                  | RANK IN GENE LIST | RANK METRIC SCORE | RUNNING ES | CORE ENRICHMENT |
| 1                                        | BMP4   | BMP4                         | 123               | 6.028             | 0.1195     | Yes             |
| 2                                        | NOG    | NOG                          | 224               | 4.789             | 0.2144     | Yes             |
| 3                                        | TGFB2  | TGFB2                        | 328               | 3.962             | 0.2919     | Yes             |
| 4                                        | SMAD6  | SMAD6                        | 348               | 3.879             | 0.3714     | Yes             |
| 5                                        | BMP5   | BMP5                         | 434               | 3.509             | 0.4404     | Yes             |
| 6                                        | FZD1   | FZD1                         | 618               | 2.794             | 0.4904     | Yes             |
| 7                                        | NKX2-5 | NKX2-5                       | 754               | 2.632             | 0.5391     | Yes             |
| 8                                        | NPPB   | NPPB                         | 1070              | 1.929             | 0.5654     | Yes             |
| 9                                        | BMP10  | BMP10                        | 1088              | 1.924             | 0.6045     | Yes             |
| 10                                       | BMP2   | BMP2                         | 1517              | 1.479             | 0.6166     | Yes             |
| 11                                       | NPPA   | NPPA                         | 1598              | 1.408             | 0.6424     | Yes             |
| 12                                       | TGFB1  | TGFB1                        | 1638              | 1.381             | 0.6693     | Yes             |
| 13                                       | GATA4  | GATA4                        | 1660              | 1.356             | 0.6964     | Yes             |
| 14                                       | CHRD   | CHRD                         | 1747              | 1.294             | 0.7195     | Yes             |
| 15                                       | BMPR2  | BMPR2                        | 2175              | 1.04              | 0.7226     | Yes             |
| 16                                       | BMP7   | BMP7                         | 2468              | 0.935             | 0.7294     | Yes             |
| 17                                       | GSK3B  | GSK3B                        | 2661              | 0.885             | 0.7394     | Yes             |
| 18                                       | CTNNB1 | CTNNB1                       | 2873              | 0.824             | 0.7473     | Yes             |
| 19                                       | SMAD1  | SMAD1                        | 4004              | 0.62              | 0.7114     | No              |
| 20                                       | BMPR1A | BMPR1A                       | 4196              | 0.593             | 0.7154     | No              |
| 21                                       | SMAD5  | SMAD5                        | 5296              | 0.452             | 0.6773     | No              |
| 22                                       | MEF2C  | MEF2C                        | 5496              | 0.428             | 0.6776     | No              |
| 23                                       | MAP3K7 | MAP3K7                       | 6985              | 0.268             | 0.6188     | No              |
| 24                                       | HNF1A  |                              | 7505              | 0.217             | 0.6009     | No              |
| 25                                       | ATF2   | ATF2                         | 9280              | 0.063             | 0.5256     | No              |
| 26                                       | SMAD4  | SMAD4                        | 9814              | 0.005             | 0.5027     | No              |
| 27                                       | RFC1   | RFC1                         | 12640             | -0.02             | 0.3811     | No              |
| 28                                       | ACVR1  | ACVR1                        | 13433             | -0.105            | 0.349      | No              |
| 29                                       | TGFBR2 | TGFBR2                       | 13945             | -0.164            | 0.3304     | No              |
| 30                                       | AXIN1  | AXIN1                        | 14035             | -0.175            | 0.3301     | No              |
| 31                                       | DVL1   | DVL1                         | 14975             | -0.301            | 0.2958     | No              |

|    |        |        |       |        |        |    |
|----|--------|--------|-------|--------|--------|----|
| 32 | TGFB3  | TGFB3  | 15146 | -0.327 | 0.2953 | No |
| 33 | APC    | APC    | 15186 | -0.333 | 0.3005 | No |
| 34 | TGFBR1 | TGFBR1 | 15434 | -0.371 | 0.2975 | No |
| 35 | MYL2   | MYL2   | 20846 | -1.802 | 0.1011 | No |
| 35 | MYL2   | MYL2   | 20846 | -1.802 | 0.1011 | No |



**Supplementary Table 6. List of primary antibodies used in immunocytochemistry (ICC) and Western blotting (WB).**

| Protein    | Species | Application                 | Catalog No. | Vendor                                  |
|------------|---------|-----------------------------|-------------|-----------------------------------------|
| EZRIN      | Mouse   | 1:2000 (ICC)                | E8897       | Sigma-Aldrich                           |
| E-CADHERIN | Mouse   | 1:500 (ICC)<br>1:1000 (WB)  | 610181      | BD Biosciences                          |
| NANOG      | Rabbit  | 1:500 (ICC)<br>1:2000 (WB)  | 4903S       | Cell Signaling Technology               |
| OCT4       | Mouse   | 1:200 (ICC)<br>1:500 (WB)   | SC-5279     | Santa-Cruz Biotechnology                |
| SOX2       | Rabbit  | 1:1000 (ICC)<br>1:1000 (WB) | 09-0024     | Stemgent                                |
| GAPDH      | Rabbit  | 1:1000 (WB)                 | SC-25778    | Santa-Cruz Biotechnology                |
| BRACHYURY  | Rabbit  | 1:100 (ICC)                 | SC-20109    | Santa-Cruz Biotechnology                |
| SNAIL      | Rabbit  | 1:100 (ICC)                 | SC-28199    | Santa-Cruz Biotechnology                |
| SLUG       | Rabbit  | 1:400 (ICC)                 | 9585        | Cell Signaling Technology               |
| N-CADHERIN | Rat     | 1:500 (ICC)                 | MNCD2-c     | Developmental Studies<br>Hybridoma Bank |
| FOXA2      | Rabbit  | 1:500 (ICC)                 | WRAB-1200   | Seven Hills Bioreagents                 |
| pSMAD1/5   | Rabbit  | 1:100 (ICC)<br>1:1000 (WB)  | 9516S       | Cell Signaling Technology               |
| SMAD1/5/8  | Rabbit  | 1:1000 (WB)                 | SC-6031-R   | Santa-Cruz Biotechnology                |
| CDX2       | Mouse   | 1:500 (ICC)                 | MU392A-5UC  | Biogenex                                |
| GATA3      | Mouse   | 1:100 (ICC)                 | SC-268      | Santa-Cruz Biotechnology                |
| SSEA-4     | Mouse   | 1:500 (ICC)                 | MAB4304     | EMD Millipore                           |
| BMP4       | Mouse   | 1:1000 (WB)                 | 4680        | Cell Signaling Technology               |

**Supplementary Table 7. List of qRT-PCR primers.**

| Gene             | Primer Sequences (5' -> 3')     | Reference               |
|------------------|---------------------------------|-------------------------|
| <i>NANOG</i>     | Forward: GATTTGTGGGCCTGAAGAAA   | NA                      |
|                  | Reverse: ATGGAGGAGGGAAGAGGAGA   | NA                      |
| <i>OCT4</i>      | Forward: GTGGAGGAAGCTGACAACAA   | NA                      |
|                  | Reverse: GGTTCTCGATACTGGTTTCGC  | NA                      |
| <i>SOX2</i>      | Forward: GCTTAGCCTCGTCGATGAAC   | NA                      |
|                  | Reverse: AACCCCAAGATGCACAACCTC  | NA                      |
| <i>GAPDH</i>     | Forward: CTCTGCTCCTCCTGTTTCGAC  | NA                      |
|                  | Reverse: TTAAAAGCAGCCCTGGTGAC   | NA                      |
| <i>CDH1</i>      | Forward: TCTTCAATCCCACCACGTACA  | NA                      |
|                  | Reverse: TGCCATCGTTGTTCACTGGA   | NA                      |
| <i>CDH2</i>      | Forward: ATCAACCCCATACACCAGCC   | NA                      |
|                  | Reverse: GTCGATTGGTTTGACCACGG   | NA                      |
| <i>CLDN6</i>     | Forward: TGTTCCGGCTTGCTGGTCTAC  | PrimerBank <sup>3</sup> |
|                  | Reverse: CGGGGATTAGCGTCAGGAC    | PrimerBank              |
| <i>BRACHYURY</i> | Forward: TGCTGCAATCCCATGACA     | PrimerBank              |
|                  | Reverse: CGTTGCTCACAGACCACA     | PrimerBank              |
| <i>SNAI1</i>     | Forward: TCGGAAGCCTAACTACAGCGA  | PrimerBank              |
|                  | Reverse: AGATGAGCATTGGCAGCGAG   | PrimerBank              |
| <i>SNAI2</i>     | Forward: CGAACTGGACACACATACAGTG | PrimerBank              |
|                  | Reverse: CTGAGGATCTCTGGTTGTGGT  | PrimerBank              |
| <i>FOXA2</i>     | Forward: CGACTGGAGCAGCTACTATGC  | NA                      |
|                  | Reverse: TACGTGTTTCATGCCGTTTCAT | NA                      |
| <i>GATA2</i>     | Forward: CAGCAAGGCTCGTTCCTGTT   | PrimerBank              |
|                  | Reverse: GGCTTGATGAGTGGTTCGGT   | PrimerBank              |
| <i>GATA3</i>     | Forward: GCCCCTCATTAAGCCCAAG    | PrimerBank              |
|                  | Reverse: TTGTGGTGGTCTGACAGTTCG  | PrimerBank              |
| <i>CDX2</i>      | Forward: GACGTGAGCATGTACCCTAGC  | PrimerBank              |
|                  | Reverse: GCGTAGCCATTCCAGTCCT    | PrimerBank              |
| <i>TP63</i>      | Forward: CTGGAAAACAATGCCCAGA    | Li et al. <sup>4</sup>  |
|                  | Reverse: AGAGAGCATCGAAGGTGGAG   | Li et al. <sup>4</sup>  |
| <i>GATA4</i>     | Forward: CGACACCCCAATCTCGATATG  | PrimerBank              |
|                  | Reverse: GTTGCACAGATAGTGACCCGT  | PrimerBank              |
| <i>GATA6</i>     | Forward: CTCAGTTCCTACGCTTCGCAT  | PrimerBank              |
|                  | Reverse: GTCGAGGTCAGTGAACAGCA   | PrimerBank              |
| <i>KRT7</i>      | Forward: AGGATGTGGATGCTGCCTAC   | Li et al. <sup>4</sup>  |

|               |                                          |                                   |
|---------------|------------------------------------------|-----------------------------------|
|               | <i>Reverse:</i> CACCACAGATGTGTCGGAGA     | Li <i>et al.</i> <sup>4</sup>     |
| <i>CGA</i>    | <i>Forward:</i> CACTCCACTAAGGTCCAAGAAGA  | PrimerBank                        |
|               | <i>Reverse:</i> CCGTGTGGTTCTCCACTTTGA    | PrimerBank                        |
| <i>HLA-G</i>  | <i>Forward:</i> GAGGAGACACGGAACACCAAG    | PrimerBank                        |
|               | <i>Reverse:</i> GTCGCAGCCAATCATCCACT     | PrimerBank                        |
| <i>ITGB6</i>  | <i>Forward:</i> CTCAACACAATAAAGGAGCTGGG  | PrimerBank                        |
|               | <i>Reverse:</i> AAAGGGGATACAGGTTTTTCCAC  | PrimerBank                        |
| <i>VTCN1</i>  | <i>Forward:</i> TCTGGGCATCCCAAGTTGAC     | PrimerBank                        |
|               | <i>Reverse:</i> TCCGCCTTTTGATCTCCGATT    | PrimerBank                        |
| <i>GABRP</i>  | <i>Forward:</i> TTTCTCAGGCCCAATTTTGGT    | PrimerBank                        |
|               | <i>Reverse:</i> GCTGTCCGAGGTATATGGTGG    | PrimerBank                        |
| <i>MUC16</i>  | <i>Forward:</i> GGAGCACACGCTAGTTCAGAA    | PrimerBank                        |
|               | <i>Reverse:</i> GGTCTCTATTGAGGGGAAGGT    | PrimerBank                        |
| <i>HAND1</i>  | <i>Forward:</i> CCAAGGATGCACAGTCTGG      | PrimerBank                        |
|               | <i>Reverse:</i> AGGAGGAAAACCTTCGTGCTG    | PrimerBank                        |
| <i>POSTN</i>  | <i>Forward:</i> GAAAGGGAGTAAGCAAGGGAG    | Dobrev <i>et al.</i> <sup>5</sup> |
|               | <i>Reverse:</i> ATAATGTCCAGTCTCCAGGTTG   | Dobrev <i>et al.</i> <sup>5</sup> |
| <i>TFAP2A</i> | <i>Forward:</i> GCATATCCGTTACGCCGAT      | Tadeu <i>et al.</i> <sup>6</sup>  |
|               | <i>Reverse:</i> GGGAGATTGACCTACAGTGCC    | Tadeu <i>et al.</i> <sup>6</sup>  |
| <i>TFAP2B</i> | <i>Forward:</i> AGCAAATGTCACGTTACTCACC   | PrimerBank                        |
|               | <i>Reverse:</i> TGTGCTGCCGGTTCAAATACT    | PrimerBank                        |
| <i>KRT17</i>  | <i>Forward:</i> AAGATCCGTGACTGGTACCAGAGG | Sankar <i>et al.</i> <sup>7</sup> |
|               | <i>Reverse:</i> GATGTCGGCCTCCACACTCAGG   | Sankar <i>et al.</i> <sup>7</sup> |
| <i>KRT18</i>  | <i>Forward:</i> TCGCAAATACTGTGGACAATGC   | PrimerBank                        |
|               | <i>Reverse:</i> GCAGTCGTGTGATATTGGTGT    | PrimerBank                        |
| <i>BMP2</i>   | <i>Forward:</i> ACTACCAGAAACGAGTGGGAA    | PrimerBank                        |
|               | <i>Reverse:</i> GCATCTGTTCTCGGAAAACCT    | PrimerBank                        |
| <i>BMP4</i>   | <i>Forward:</i> TCCACAGCACTGGTCTTGAG     | Xu <i>et al.</i> <sup>8</sup>     |
|               | <i>Reverse:</i> GGGATGTTCTCCAGATGTTCTT   | Xu <i>et al.</i> <sup>8</sup>     |
| <i>BMP6</i>   | <i>Forward:</i> AGCGACACCACAAAGAGTTCA    | PrimerBank                        |
|               | <i>Reverse:</i> GCTGATGCTCCTGTAAGACTTGA  | PrimerBank                        |
| <i>BMP7</i>   | <i>Forward:</i> TCGGCACCCATGTTTCATGC     | PrimerBank                        |
|               | <i>Reverse:</i> GAGGAAATGGCTATCTTGCAGG   | PrimerBank                        |

NA: not applicable.

**Supplementary Table 8. Summary of normalized gene expression fold change (Gene FC, blue) and corresponding P-values (red) in qRT-PCR results shown in Fig. 4a-e and Fig. 5c.**

| Gene FC*     | Glass-2D | Gel-2D | Glass-3D | Gel-3D | PS-2D  | P-Value*     | Gel-2D | Glass-3D | Gel-3D | PS-2D  |
|--------------|----------|--------|----------|--------|--------|--------------|--------|----------|--------|--------|
| <i>NANOG</i> | 1        | 1.1522 | 0.9595   | 0.4603 | 0.0578 | <i>NANOG</i> | 0.0598 | 0.7934   | 0.0012 | 2E-05  |
| <i>OCT4</i>  | 1        | 0.9478 | 1.0273   | 0.7412 | 0.3924 | <i>OCT4</i>  | 0.6499 | 0.8433   | 0.1212 | 0.0008 |
| <i>SOX2</i>  | 1        | 0.6568 | 0.6266   | 0.2098 | NT     | <i>SOX2</i>  | 0.1442 | 0.1137   | 0.0098 | NT     |
| <i>CDH1</i>  | 1        | 0.7587 | 0.6224   | 1.8445 | 0.464  | <i>CDH1</i>  | 0.0735 | 0.0154   | 0.059  | 0.001  |
| <i>CDH2</i>  | 1        | 0.7448 | 0.801    | 0.2637 | 11.195 | <i>CDH2</i>  | 0.0622 | 0.1887   | 0.0007 | 5E-07  |
| <i>CLDN6</i> | 1        | 0.8372 | 1.05     | 1.4517 | NT     | <i>CLDN6</i> | 0.4658 | 0.8044   | 0.1833 | NT     |
| <i>BRA</i>   | 1        | 0.5262 | 0.3759   | 18.8   | 1585.6 | <i>BRA</i>   | 0.0544 | 0.0373   | 0.0006 | 2E-06  |
| <i>SNAI1</i> | 1        | 0.9643 | 1.1466   | 1.4097 | 7.6408 | <i>SNAI1</i> | 0.6599 | 0.1172   | 0.1472 | 2E-07  |
| <i>SNAI2</i> | 1        | 1      | 1.0984   | 2.5537 | 1.4433 | <i>SNAI2</i> | 0.9806 | 0.0914   | 0.0238 | 0.0052 |
| <i>FOXA2</i> | 1        | 0.6132 | 1.2135   | 0.0437 | 8.4235 | <i>FOXA2</i> | 0.5387 | 0.8252   | 0.1609 | 9E-05  |
| <i>GATA2</i> | 1        | 1.8771 | 2.0677   | 160.32 | NT     | <i>GATA2</i> | 0.1114 | 0.034    | 0.0005 | NT     |
| <i>GATA3</i> | 1        | 8.1577 | 6.3796   | 3040.2 | NT     | <i>GATA3</i> | 0.0931 | 0.0992   | 0.0008 | NT     |
| <i>CDX2</i>  | 1        | 9.0195 | 19.566   | 530.69 | NT     | <i>CDX2</i>  | 0.088  | 0.2608   | 0.0011 | NT     |
| <i>TP63</i>  | 1        | 71.724 | 12.463   | 23429  | NT     | <i>TP63</i>  | 0.1116 | 0.0099   | 0.0295 | NT     |
| <i>GATA4</i> | 1        | 0.1935 | 0.0778   | 1.7343 | NT     | <i>GATA4</i> | 0.1331 | 0.093    | 0.2494 | NT     |
| <i>GATA6</i> | 1        | 5.0452 | 0.4693   | 3.3463 | NT     | <i>GATA6</i> | 0.0718 | 0.4822   | 0.2649 | NT     |
| <i>KRT7</i>  | 1        | 0.5512 | 0.3986   | 1.9239 | NT     | <i>KRT7</i>  | 0.0021 | 0.0004   | 0.3007 | NT     |
| <i>CGA</i>   | 1        | 0.4663 | 0.7821   | 3.304  | NT     | <i>CGA</i>   | 0.1149 | 0.6359   | 0.214  | NT     |
| <i>HLA-G</i> | 1        | 0.3727 | 0.3892   | 0.4052 | NT     | <i>HLA-G</i> | 0.0018 | 0.0033   | 0.0277 | NT     |
| <i>ITGB6</i> | 1        | 4.7892 | 0.9671   | 591.74 | NT     | <i>ITGB6</i> | 0.248  | 0.9684   | 0.0044 | NT     |
| <i>GABRP</i> | 1        | 0.869  | 1.1178   | 24.297 | NT     | <i>GABRP</i> | 0.2839 | 0.4897   | 0.0155 | NT     |
| <i>VTCN1</i> | 1        | 0.7895 | 0.0355   | 104.82 | NT     | <i>VTCN1</i> | 0.6431 | 0.0102   | 0.0043 | NT     |
| <i>MUC16</i> | 1        | 0.3802 | 0.786    | 2.9286 | NT     | <i>MUC16</i> | 0.0201 | 0.3676   | 0.0107 | NT     |
| <i>HAND1</i> | 1        | 135.68 | 116.46   | 30774  | NT     | <i>HAND1</i> | 0.0786 | 0.1017   | 0.0014 | NT     |
| <i>KRT17</i> | 1        | 0.5576 | 0.4645   | 2.9104 | NT     | <i>KRT17</i> | 0.0377 | 0.0256   | 0.001  | NT     |
| <i>KRT18</i> | 1        | 0.9496 | 1.071    | 3.3393 | NT     | <i>KRT18</i> | 0.7013 | 0.4844   | 0.0091 | NT     |

|               |           |        |        |        |           |               |           |          |          |           |
|---------------|-----------|--------|--------|--------|-----------|---------------|-----------|----------|----------|-----------|
| <i>POSTN</i>  | 1         | 1.0868 | 0.8867 | 3.2717 | <i>NT</i> | <i>POSTN</i>  | 0.8399    | 0.7694   | 0.012    | <i>NT</i> |
| <i>TFAP2A</i> | 1         | 72.791 | 21.807 | 14184  | <i>NT</i> | <i>TFAP2A</i> | 0.0665    | 0.1232   | 0.0023   | <i>NT</i> |
| <i>TFAP2B</i> | <i>ND</i> | 1      | 0.1237 | 111.7  | <i>NT</i> | <i>TFAP2B</i> | <i>NA</i> | 0.1047** | 0.0097** | <i>NT</i> |
| <i>BMP2</i>   | 1         | 0.7732 | 0.4749 | 2.9862 | <i>NT</i> | <i>BMP2</i>   | 0.2583    | 0.0147   | 0.0041   | <i>NT</i> |
| <i>BMP4</i>   | 1         | 1.3545 | 0.8368 | 66.177 | <i>NT</i> | <i>BMP4</i>   | 0.4753    | 0.6676   | 6E-06    | <i>NT</i> |
| <i>BMP6</i>   | 1         | 0.7351 | 0.5598 | 0.1727 | <i>NT</i> | <i>BMP6</i>   | 0.2505    | 0.0473   | 0.0029   | <i>NT</i> |
| <i>BMP7</i>   | 1         | 1.0348 | 0.9192 | 1.7012 | <i>NT</i> | <i>BMP7</i>   | 0.8611    | 0.5411   | 0.0132   | <i>NT</i> |

*ND*: not detected;

*NA*: not applicable;

*NT*: not tested;

\*: Normalized gene expression fold change and *P*-values were all calculated in comparison to the Glass-2D condition, unless noted otherwise. *P*-values were calculated using un-paired, two-sided Student's *t*-test;

\*\**P*-values were calculated in comparison to the Gel-2D condition.

**Supplementary Table 9. Summary of normalized gene expression fold change (Gene FC, blue) and corresponding P-values (red) in qRT-PCR results of the BMP inhibition assay (Supplementary Fig. 11c).**

| Gene FC*     | Glass-2D | Gel-3D     | LDN-d2    | LDN-d2&3  | P-value*     | Gel-3D   | LDN-d2   | LDN-d2&3 |
|--------------|----------|------------|-----------|-----------|--------------|----------|----------|----------|
| <i>GATA2</i> | 1        | 172.7417   | 14.0872   | 4.3722    | <i>GATA2</i> | 0.0098   | 0.0538   | 0.2703   |
| <i>GATA3</i> | 1        | 1531.6606  | 90.6801   | 43.6863   | <i>GATA3</i> | 7.44E-06 | 7.02E-04 | 1.20E-03 |
| <i>CDX2</i>  | 1        | 49.4718    | 7.3310    | 1.1481    | <i>CDX2</i>  | 0.0281   | 0.2280   | 0.8820   |
| <i>TP63</i>  | ND       | 12446.1197 | 1497.5686 | 1046.1600 | <i>TP63</i>  | 0.0067** | 0.5894** | NA       |
| <i>BMP4</i>  | 1        | 29.9719    | 5.8027    | 3.2391    | <i>BMP4</i>  | 0.0238   | 0.0945   | 0.2471   |
| <i>ITGB6</i> | 1        | 723.4922   | 91.4117   | 55.6471   | <i>ITGB6</i> | 0.0016   | 0.0133   | 0.0772   |
| <i>VTCN1</i> | 1        | 105.4589   | 3.1638    | 1.7348    | <i>VTCN1</i> | 0.0004   | 0.0610   | 0.9567   |
| <i>GABRP</i> | 1        | 20.6821    | 1.2107    | 0.9584    | <i>GABRP</i> | 0.0302   | 0.3096   | 0.9878   |
| <i>MUC16</i> | 1        | 1.6520     | 0.7210    | 0.5805    | <i>MUC16</i> | 0.0434   | 0.1593   | 0.0495   |
| <i>HAND1</i> | 1        | 21838.7241 | 1567.4955 | 838.0578  | <i>HAND1</i> | 4.55E-06 | 9.40E-05 | 1.30E-04 |
| <i>POSTN</i> | 1        | 3.1656     | 0.9302    | 1.0339    | <i>POSTN</i> | 0.0178   | 0.8984   | 0.9944   |

ND: not detected;

NA: not applicable;

\*: Normalized gene expression fold change and *P*-values were all calculated in comparison to the Glass-2D condition, unless noted otherwise. *P*-values were calculated using un-paired, two-sided Student's *t*-test;

\*\**P*-values were calculated in comparison to the LDN-d2&3 condition.

## Supplementary References

1. Roost, M. S., *et al.* KeyGenes, a tool to probe tissue differentiation using a human fetal transcriptional atlas. *Stem Cell Rep.* **4**, 1112-1124 (2015).
2. Mallon, B. S., *et al.* StemCellDB: The human pluripotent stem cell database at the National Institutes of Health. *Stem Cell Res.* **10**, 57-66 (2013).
3. Wang, X. W., Spandidos, A., Wang, H. J. and Seed, B. PrimerBank: A PCR primer database for quantitative gene expression analysis, 2012 update. *Nucleic. Acids. Res.* **40**, D1144-D1149 (2012).
4. Li, Y. C., *et al.* BMP4-directed trophoblast differentiation of human embryonic stem cells is mediated through Delta Np63(+) cytotrophoblast stem cell state. *Development* **140**, 3965-3976 (2013).
5. Dobрева, M. P., *et al.* Periostin as a biomarker of the amniotic membrane. *Stem Cells Int.* **2012**, 987185 (2012).
6. Tadeu, A. M. B., *et al.* Transcriptional profiling of ectoderm specification to keratinocyte fate in human embryonic stem cells. *PLoS One* **10**, e0122493 (2015).
7. Sankar, S., *et al.* A novel role for keratin 17 in coordinating oncogenic transformation and cellular adhesion in ewing sarcoma. *Mol. Cell Biol.* **33**, 4448-4460 (2013).
8. Xu, J., *et al.* Transcriptional regulation of bone morphogenetic protein 4 by tumor necrosis factor and its relationship with age-related macular degeneration. *FASEB J.* **25**, 2221-2233 (2011).
