# Supplementary material
Source: PubMed Central journal article supplement (PMC5374007)
Supplement: NIHMS831959-supplement-4.pdf [file NIHMS831959-supplement-4.pdf]

Colour Charges Form – Nature Research Journals**COLOUR FIGURES**

Nature Research Journals are committed to providing authors with the highest quality figures, and we use the latest techniques to achieve this reproduction. We recognise, however, that excessive colour figure and page charges can sometimes place an enormous burden on authors. We therefore charge authors a fee of \$620/£410/€550 for the first colour figure and \$310/£205/€275 per figure for additional colour figures; this covers part, but not all, of our additional costs for four-colour reproduction. Authors will be charged in the currency that is most applicable to the corresponding author's address. (Please note that in EU countries VAT will be added if you are unable to provide us with your VAT details below.)

No author will be denied publication based on his/her inability to meet these charges. If we agree that colour is essential but you are unable to meet the costs, they will be waived if you explain the circumstances before your paper is published. Otherwise you will be billed after publication.

**PLEASE COMPLETE AND SIGN THE SECTION BELOW AND RETURN A COPY OF THIS SHEET TO THE EDITORIAL ASSISTANT BY REPLYING TO THE EMAIL, WHERE THE LINK TO THIS FORM CAN BE FOUND. PLEASE NOTE: THERE ARE 2 PAGES TO THE FORM.**

Corresponding Author Name

**Jianping Fu**

---

Journal

**Nature Materials**

---

Manuscript Reference Number:

**NM16082504B**

---

Contact Name (please note: this will be the person that will process the invoice)

**Jianping Fu**

---

Contact email address (please note: this is where the invoice will be sent)

**jpfu@umich.edu**

---

Contact Address:

Department: **Mechanical Engineering** University of Michigan, Ann Arbor Institution/Organisation \_\_\_\_\_

First line of your address: **2350 Hayward Street**

---

Second line of your address: **2664 G.G. Brown Addition**

---

City: **Ann Arbor** Postal Code: **48109** Country: **USA**

---

Please tick the options that do apply.

I agree to pay the sum requested in the event that colour is considered essential.

I am unable to meet the costs of colour for the following reason:

I am a VAT registered paying member of the EU

If you ticked the VAT box above, you must provide your VAT number below

VAT NUMBER

|  |  |  |  |  |  |  |  |  |  |  |  |  |  |  |  |  |  |  |  |  |
|--|--|--|--|--|--|--|--|--|--|--|--|--|--|--|--|--|--|--|--|--|
|  |  |  |  |  |  |  |  |  |  |  |  |  |  |  |  |  |  |  |  |  |
|--|--|--|--|--|--|--|--|--|--|--|--|--|--|--|--|--|--|--|--|--|

SIGNED:  11/18/2016

NAME IN BLOCK LETTERS: JIANPING FU
